# Supplementary material
Source: Springer Nature journal article supplement (https://www.springermedizin.de/resource/supplementary/12889_2009_1810_MOESM1_ESM.pdf/9504078)
Supplement: MOESM1 [file 9504078]

Total population of long-term disability pensioners having musculoskeletal disorders (n= 899)

**Group 1 (n= 89)**  
Back pain disability pensioners participating in the RCT

Intervention group (n=45)

1 year follow-up (n=43); 2 missing  
3 year follow-up (n=43)

Control group (n=44)

1 year follow-up (n=44)  
3 year follow-up (n=44)

**Group 2 (n=361)**  
Back pain disability pensioners not volunteering for the RCT

1 year follow-up (n=356); 5 missing  
3 year follow-up (n= 349); 7 missing

**Group 3 (n=449)**  
Disability pensioners with other musculoskeletal disorders, not eligible for the RCT

1 year follow-up (n=444); 5 missing  
3 year follow-up (n=441); 3 missing
